# Supplementary material for: Risk factors, risk stratification and risk-specific surveillance strategies after endovascular aneurysm repair: study protocol for a Delphi study by the International RIsk Stratification in EVAR (IRIS-EVAR) working group
Source: HighWire-hosted journal article supplement (doi:10.1136/bmjopen-2021-055803), 2022-04-01
Supplement: bmjopen-2021-055803supp002_data_supplement.pdf [file bmjopen-2021-055803supp002_data_supplement.pdf]

| Domain 1 – Preoperative anatomy                                                                                                                                                                                                                                                                                                     |
|-------------------------------------------------------------------------------------------------------------------------------------------------------------------------------------------------------------------------------------------------------------------------------------------------------------------------------------|
| <p>In <b>domain 1</b>, if all factors are answered with “yes”, the risk for the domain will be low.</p> <ol style="list-style-type: none"> <li>1. Strongly agree</li> <li>2. Agree</li> <li>3. Disagree</li> <li>4. Strongly disagree</li> <li>5. Can’t say</li> </ol> <p>Comments/suggestions:</p>                                 |
| <p>In <b>domain 1</b>, if all factors of <b>high importance</b> are answered with “yes”, the risk for the domain will be low.</p> <ol style="list-style-type: none"> <li>1. Strongly agree</li> <li>2. Agree</li> <li>3. Disagree</li> <li>4. Strongly disagree</li> <li>5. Can’t say</li> </ol> <p>Comments/suggestions:</p>       |
| <p>In <b>domain 1</b>, if all factors are answered with “no”, the risk for the domain will be high.</p> <ol style="list-style-type: none"> <li>1. Strongly agree</li> <li>2. Agree</li> <li>3. Disagree</li> <li>4. Strongly disagree</li> <li>5. Can’t say</li> </ol> <p>Comments/suggestions:</p>                                 |
| <p>In <b>domain 1</b>, if all factors of <b>high importance</b> are answered with “no”, the risk for the domain will be high.</p> <ol style="list-style-type: none"> <li>1. Strongly agree</li> <li>2. Agree</li> <li>3. Disagree</li> <li>4. Strongly disagree</li> <li>5. Can’t say</li> </ol> <p>Comments/suggestions:</p>       |
| <p>In <b>domain 1</b>, if at least 1 factor is answered with “no”, the risk for the domain will be high.</p> <ol style="list-style-type: none"> <li>1. Strongly agree</li> <li>2. Agree</li> <li>3. Disagree</li> <li>4. Strongly disagree</li> <li>5. Can’t say</li> </ol> <p>Comments/suggestions:</p>                            |
| <p>In <b>domain 1</b>, if at least 1 factor of <b>high importance</b> is answered with “no”, the risk for the domain will be high.</p> <ol style="list-style-type: none"> <li>6. Strongly agree</li> <li>7. Agree</li> <li>8. Disagree</li> <li>9. Strongly disagree</li> <li>10. Can’t say</li> </ol> <p>Comments/suggestions:</p> |
| <p>In <b>domain 1</b>, if at least 2 factors are answered with “no”, the risk for the domain will be high.</p> <ol style="list-style-type: none"> <li>1. Strongly agree</li> <li>2. Agree</li> <li>3. Disagree</li> </ol>                                                                                                           |

|                                                                                                                                                                                                                                                     |
|-----------------------------------------------------------------------------------------------------------------------------------------------------------------------------------------------------------------------------------------------------|
| 4. Strongly disagree<br>5. Can't say<br>Comments/suggestions:                                                                                                                                                                                       |
| In <b>domain 1</b> , if at least 2 factors of <b>high importance</b> are answered with "no", the risk for the domain will be high.<br>1. Strongly agree<br>2. Agree<br>3. Disagree<br>4. Strongly disagree<br>5. Can't say<br>Comments/suggestions: |
| In <b>domain 1</b> , if at least 3 factors are answered with "no", the risk for the domain will be high.<br>1. Strongly agree<br>2. Agree<br>3. Disagree<br>4. Strongly disagree<br>5. Can't say<br>Comments/suggestions:                           |
| In <b>domain 1</b> , if at least 3 factors of <b>high importance</b> are answered with "no", the risk for the domain will be high.<br>1. Strongly agree<br>2. Agree<br>3. Disagree<br>4. Strongly disagree<br>5. Can't say<br>Comments/suggestions: |
| Any other suggestions about stratifying risk in domain 1?                                                                                                                                                                                           |
| <b>Domain 2 – Aortic device</b>                                                                                                                                                                                                                     |
| In <b>domain 2</b> , if all factors are answered with "yes", the risk for the domain will be low.<br>1. Strongly agree<br>2. Agree<br>3. Disagree<br>4. Strongly disagree<br>5. Can't say<br>Comments/suggestions:                                  |
| In <b>domain 2</b> , if all factors of <b>high importance</b> are answered with "yes", the risk for the domain will be low.<br>1. Strongly agree<br>2. Agree<br>3. Disagree<br>4. Strongly disagree<br>5. Can't say<br>Comments/suggestions:        |
| In <b>domain 2</b> , if all factors are answered with "no", the risk for the domain will be high.<br>1. Strongly agree<br>2. Agree<br>3. Disagree<br>4. Strongly disagree<br>5. Don't know                                                          |

|                                                                                                                                                                                                                     |
|---------------------------------------------------------------------------------------------------------------------------------------------------------------------------------------------------------------------|
| Comments/suggestions:                                                                                                                                                                                               |
| In <b>domain 2</b> , if all factors of <b>high importance</b> are answered with “no”, the risk for the domain will be high.<br>1. Strongly agree<br>2. Agree<br>3. Disagree<br>4. Strongly disagree<br>5. Can’t say |
| Comments/suggestions:                                                                                                                                                                                               |
| In <b>domain 2</b> , if at least 1 factor is answered with “no”, the risk for the domain will be high.<br>1. Strongly agree<br>2. Agree<br>3. Disagree<br>4. Strongly disagree<br>5. Can’t say                      |
| Comments/suggestions:                                                                                                                                                                                               |
| In <b>domain 2</b> , if at least 1 factor of high importance is answered with “no”, the risk for the domain will be high.<br>1. Strongly agree<br>2. Agree<br>3. Disagree<br>4. Strongly disagree<br>5. Can’t say   |
| Comments/suggestions:                                                                                                                                                                                               |
| Any other suggestions about stratifying risk in domain 2?                                                                                                                                                           |
| <b>Domain 3 – Procedure performance</b>                                                                                                                                                                             |
| In <b>domain 3</b> , if all factors are answered with “yes”, the risk for the domain will be low.<br>1. Strongly agree<br>2. Agree<br>3. Disagree<br>4. Strongly disagree<br>5. Can’t say                           |
| Comments/suggestions:                                                                                                                                                                                               |
| In <b>domain 3</b> , if all factors of <b>high importance</b> are answered with “yes”, the risk for the domain will be low.<br>1. Strongly agree<br>2. Agree<br>3. Disagree<br>4. Strongly disagree<br>5. Can’t say |
| Comments/suggestions:                                                                                                                                                                                               |
| In <b>domain 3</b> , if all factors are answered with “no”, the risk for the domain will be high.<br>1. Strongly agree<br>2. Agree<br>3. Disagree<br>4. Strongly disagree<br>5. Can’t say                           |
| Comments/suggestions:                                                                                                                                                                                               |
| In <b>domain 3</b> , if all factors of <b>high importance</b> are answered with “no”, the risk for the domain will be high.                                                                                         |

|                                                                                                                                                                                                                                                                                                         |
|---------------------------------------------------------------------------------------------------------------------------------------------------------------------------------------------------------------------------------------------------------------------------------------------------------|
| <ol style="list-style-type: none"> <li>1. Strongly agree</li> <li>2. Agree</li> <li>3. Disagree</li> <li>4. Strongly disagree</li> <li>5. Can't say</li> </ol>                                                                                                                                          |
| Comments/suggestions:                                                                                                                                                                                                                                                                                   |
| <p>In <b>domain 3</b>, if at least 1 factor is answered with "no", the risk for the domain will be high.</p> <ol style="list-style-type: none"> <li>1. Strongly agree</li> <li>2. Agree</li> <li>3. Disagree</li> <li>4. Strongly disagree</li> <li>5. Can't say</li> </ol>                             |
| Comments/suggestions:                                                                                                                                                                                                                                                                                   |
| <p>In <b>domain 3</b>, if at least 1 factor of <b>high importance</b> is answered with "no", the risk for the domain will be high.</p> <ol style="list-style-type: none"> <li>1. Strongly agree</li> <li>2. Agree</li> <li>3. Disagree</li> <li>4. Strongly disagree</li> <li>5. Can't say</li> </ol>   |
| Comments/suggestions:                                                                                                                                                                                                                                                                                   |
| <p>In <b>domain 3</b>, if at least 2 factors are answered with "no", the risk for the domain will be high.</p> <ol style="list-style-type: none"> <li>1. Strongly agree</li> <li>2. Agree</li> <li>3. Disagree</li> <li>4. Strongly disagree</li> <li>5. Can't say</li> </ol>                           |
| Comments/suggestions:                                                                                                                                                                                                                                                                                   |
| <p>In <b>domain 3</b>, if at least 2 factors of <b>high importance</b> are answered with "no", the risk for the domain will be high.</p> <ol style="list-style-type: none"> <li>1. Strongly agree</li> <li>2. Agree</li> <li>3. Disagree</li> <li>4. Strongly disagree</li> <li>5. Can't say</li> </ol> |
| Comments/suggestions:                                                                                                                                                                                                                                                                                   |
| Any other suggestions about stratifying risk in domain 3?                                                                                                                                                                                                                                               |
| <b>Domain 4 – Postoperative surveillance</b>                                                                                                                                                                                                                                                            |
| <p>In <b>domain 4</b>, if all factors are answered with "yes", the risk for the domain will be low.</p> <ol style="list-style-type: none"> <li>1. Strongly agree</li> <li>2. Agree</li> <li>3. Disagree</li> <li>4. Strongly disagree</li> <li>5. Can't say</li> </ol>                                  |
| Comments/suggestions:                                                                                                                                                                                                                                                                                   |
| <p>In <b>domain 4</b>, if all factors of <b>high importance</b> are answered with "yes", the risk for the domain will be low.</p> <ol style="list-style-type: none"> <li>1. Strongly agree</li> <li>2. Agree</li> <li>3. Disagree</li> </ol>                                                            |

|                                                                                                                                                                                                                                                   |
|---------------------------------------------------------------------------------------------------------------------------------------------------------------------------------------------------------------------------------------------------|
| 4. Strongly disagree<br>5. Can't say<br>Comments/suggestions:                                                                                                                                                                                     |
| In <b>domain 4</b> , if all factors are answered with "no", the risk for the domain will be high.<br>1. Strongly agree<br>2. Agree<br>3. Disagree<br>4. Strongly disagree<br>5. Can't say<br>Comments/suggestions:                                |
| In <b>domain 4</b> , if all factors of <b>high importance</b> are answered with "no", the risk for the domain will be high.<br>1. Strongly agree<br>2. Agree<br>3. Disagree<br>4. Strongly disagree<br>5. Can't say<br>Comments/suggestions:      |
| In <b>domain 4</b> , if at least 1 factor is answered with "no", the risk for the domain will be high.<br>1. Strongly agree<br>2. Agree<br>3. Disagree<br>4. Strongly disagree<br>5. Can't say<br>Comments/suggestions:                           |
| In <b>domain 4</b> , if at least 1 factor of <b>high importance</b> is answered with "no", the risk for the domain will be high.<br>1. Strongly agree<br>2. Agree<br>3. Disagree<br>4. Strongly disagree<br>5. Can't say<br>Comments/suggestions: |
| Any other suggestions about risk stratification in domain 4?                                                                                                                                                                                      |
| <b>Risk stratification</b>                                                                                                                                                                                                                        |
| If the risk in all domains is low, the overall risk should be low.<br>1. Strongly agree<br>2. Agree<br>3. Disagree<br>4. Strongly disagree<br>5. Can't say<br>Comments/suggestions:                                                               |
| If the risk in all domains is high, the overall risk should be high.<br>1. Strongly agree<br>2. Agree<br>3. Disagree<br>4. Strongly disagree<br>5. Can't say<br>Comments/suggestions:                                                             |
| If the risk in at least 1 domain is high, the overall risk should be low.                                                                                                                                                                         |

|                                                              |                   |
|--------------------------------------------------------------|-------------------|
| 1.                                                           | Strongly agree    |
| 2.                                                           | Agree             |
| 3.                                                           | Disagree          |
| 4.                                                           | Strongly disagree |
| 5.                                                           | Can't say         |
| Comments/suggestions:                                        |                   |
| Any other suggestions about the overall risk stratification? |                   |

**Appendix 2.** Tier 2 survey: Defining the risk stratification model.
